# Supplementary material
Source: HighWire-hosted journal article supplement (http://bmjleader.bmj.com/highwire/filestream/2875/field_highwire_adjunct_files/0/leader-2023-000756supp001_data_supplement.pdf)
Supplement: leader-2023-000756supp001_data_supplement.pdf [file leader-2023-000756supp001_data_supplement.pdf]

## Supplementary File 1

### Supplementary Box 1: Interview schedule

#### Demographic questions:

- i. Would you consider yourself an academic, a policymaker, or a health or social care staff member?
- ii. Does your role require you to manage a team?
- iii. How many years of experience do you have in health and social care research, provision or policymaking?
- iv. Have you taken part in an exchange in the past?
- v. Would you be open to hosting/facilitating exchanges for your employees in the future?
- vi. Interview/Focus Group questions:

#### Defining the problem and exploring exchanges as a solution

Context: UKRI Research England put out a bid to investigate approaches to improving communication and collaboration between academics and policymakers - which suggests there may be a problem.

- 1) With that context in mind, have you experienced challenges that have prevented you from collaborating with [policymakers/academics/health and care providers]?
  - a) If yes, what specific challenges have prevented you from collaborating with [policymakers/academics/health and care providers]? *Probes: Don't know who to contact or how, lack of understanding of their roles, benefits of working with them unclear*
  - b) If yes, how have you overcome those challenges?

#### Your previous exchange experience [If yes to iv]

- 2) Have you participated, hosted, funded or in any way participated in shadowing, a secondment, a work placement or a sabbatical?
  - 3) In brief, please could you describe your 'exchange' experience? *Probes: when? who was involved? what were the aims? where? how long was the exchange? what benefits did you experience?*
  - 4) What barriers did you face to participating in this programme?
    - a) How did you overcome these barriers?
    - b) Have you got any tips on how to reduce these barriers in the future?
  - 5) To what extent could workplace-based exchange programmes help overcome the challenges you listed in collaborating with [policymakers/academics/health and care providers]?
- #### Mapping exchanges
- 6) Are you aware of any ongoing exchange/shadowing programmes in the health and social care field between frontline staff, academics and/or policymakers? If so, please give details.
    - a) Are you aware of any organisations/ websites/ apps that help to arrange these exchanges? Please describe.

#### Yes – a future exchange programme is an option [If yes to v]

- 7) Would you consider participating, hosting or funding a workplace-based exchange?
- 8) Please could you say more about why you would consider participating, hosting or funding a workplace-based exchange?
  - a) What would motivate you / your employer to develop a programme?
  - b) Where would the funding for the programme come from?

|                                                                                                                                                                                                                                                                                                                                                                                                                                                                                                                                                                                                                                                                                                                                                                                                       |
|-------------------------------------------------------------------------------------------------------------------------------------------------------------------------------------------------------------------------------------------------------------------------------------------------------------------------------------------------------------------------------------------------------------------------------------------------------------------------------------------------------------------------------------------------------------------------------------------------------------------------------------------------------------------------------------------------------------------------------------------------------------------------------------------------------|
| <p>c) Who might need to be involved or approve of the programme?</p> <p>9) Which organisations would you ideally like to arrange an exchange with from your current organisation?</p> <p>10) What barriers would employees face? What barriers would the employer's face? Probes: time, HR, lack of admin help, regulations, shifts, security clearance, travel, not knowing who to contact.<br/>No – an exchange programme is NOT an option [If <b>no</b> to v]</p> <p>11) Please could you say more about why you would not consider participating, hosting or funding a workplace-based exchange?</p> <p>Outstanding issues and other potential interviewees</p> <p>12) Are there any other points you would like to discuss? Is there anyone else you think we should speak to on this topic?</p> |
|-------------------------------------------------------------------------------------------------------------------------------------------------------------------------------------------------------------------------------------------------------------------------------------------------------------------------------------------------------------------------------------------------------------------------------------------------------------------------------------------------------------------------------------------------------------------------------------------------------------------------------------------------------------------------------------------------------------------------------------------------------------------------------------------------------|

### Supplementary Table 1: Interview analysis framework (using a RREAL sheet)

|                                                                                                              |  |
|--------------------------------------------------------------------------------------------------------------|--|
| Interviewer:                                                                                                 |  |
| Date of interview:                                                                                           |  |
| Participant number(s):                                                                                       |  |
| Demographic questions:                                                                                       |  |
| i. Would you consider yourself an academic, a policymaker, or a health or social care staff member?          |  |
| ii. Does your role require you to manage people or a team?                                                   |  |
| iii. How many years of experience do you have in health and social care research, provision or policymaking? |  |
| Defining the problem and exploring solutions                                                                 |  |
| 1. Challenges preventing collaboration                                                                       |  |
| 2. Overcoming challenges                                                                                     |  |
| Previous exchange experience                                                                                 |  |
| 3. Barriers to previous exchange – and overcoming them (and any relevant info re previous exchange)          |  |
| 4. Exchanges as a solution                                                                                   |  |
| 5. Why participate                                                                                           |  |
| 6. Funding and people involved                                                                               |  |
| 7. Ideal exchange partners                                                                                   |  |
| 8. Barriers to employee                                                                                      |  |

|                                               |  |
|-----------------------------------------------|--|
| 9. Barriers to employer                       |  |
| 10. Say why not                               |  |
| Other                                         |  |
| a. Outstanding questions                      |  |
| b. Other observations                         |  |
| c. Mapping exchanges: list and available apps |  |
| d. Important quotations                       |  |
